# Supplementary material for: Periconceptional Folic Acid Supplementation and the Risk of Spontaneous Abortion among Women Who Prepared to Conceive: Impact of Supplementation Initiation Timing
Source: MDPI journal article supplement (doi:10.3390/nu12082264), 2020-07-29
Supplement: s1 [file s1]

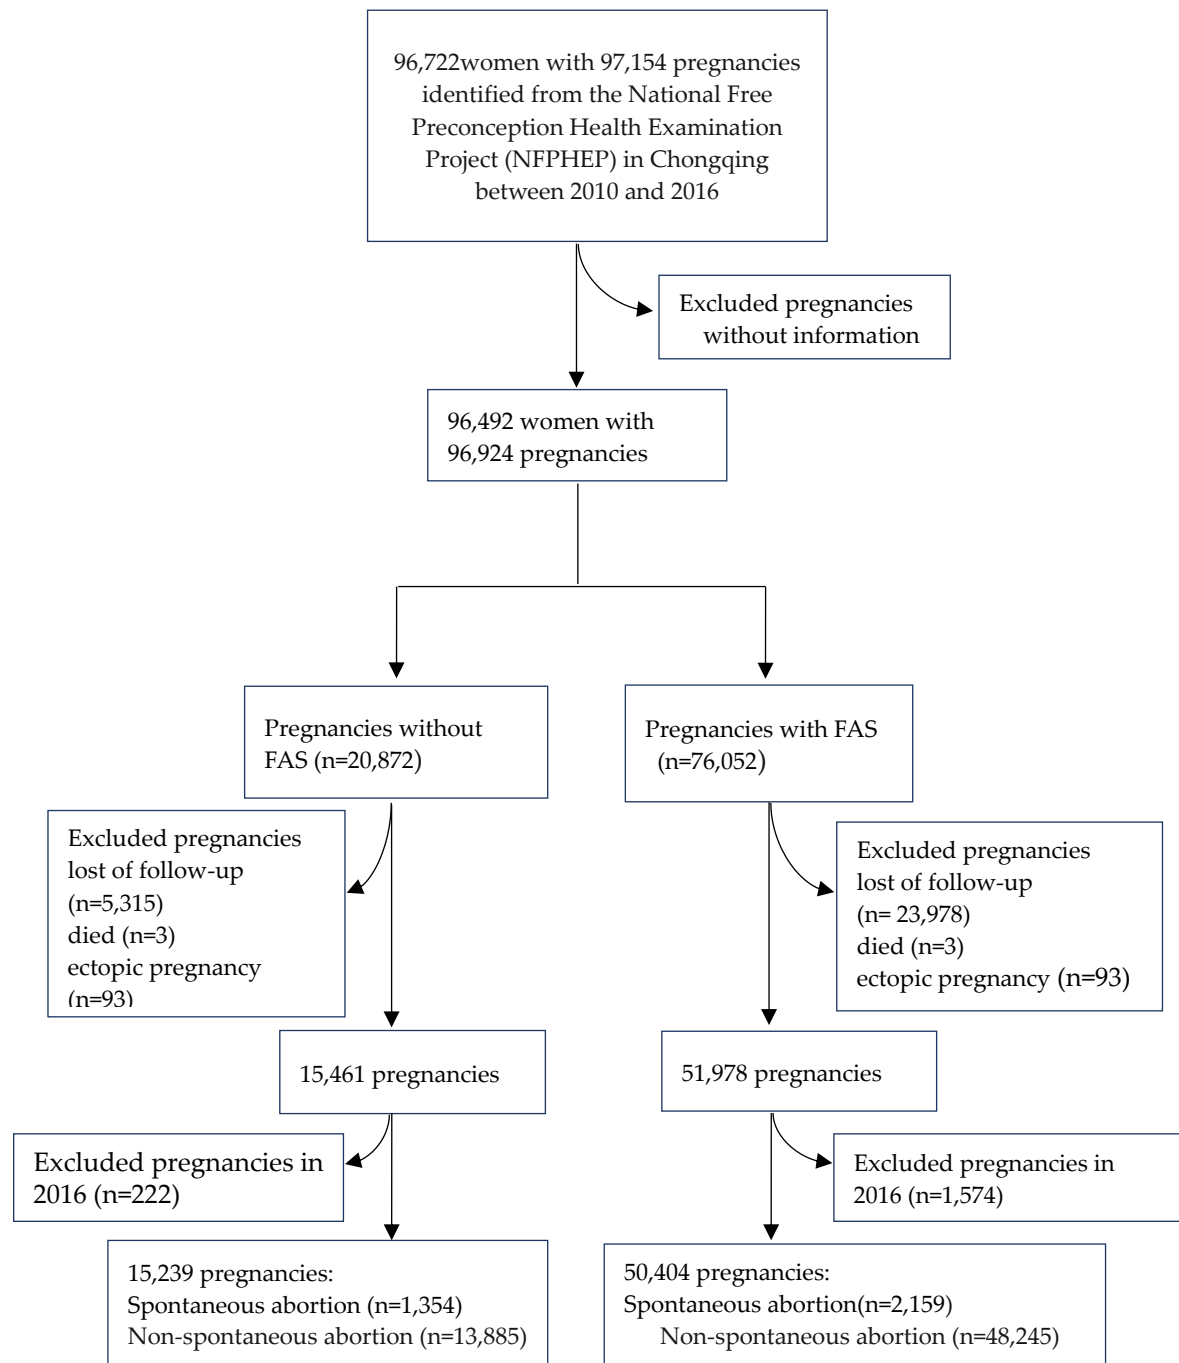

**Figure S1.** Flowchart of the pregnancies included in the study.

**Table S1.** Characteristics of pregnant women according to maternal response status between 2010 and 2016.

| Maternal characteristics                       | Response   |       |            |       | Total      |       |
|------------------------------------------------|------------|-------|------------|-------|------------|-------|
|                                                | Yes        |       | No         |       |            |       |
|                                                | (N=67,439) |       | (N=29,485) |       | (N=96,924) |       |
|                                                | n          | %     | n          | %     | n          | %     |
| Maternal periconceptional FA supplementation   |            |       |            |       |            |       |
| No supplementation                             | 15,461     | 22.93 | 5,411      | 18.35 | 20,872     | 22.93 |
| Starting after conception                      | 17,926     | 26.58 | 7,260      | 24.62 | 25,186     | 26.58 |
| Starting 1-2 months prior to conception        | 12,258     | 18.18 | 6,069      | 20.58 | 18,327     | 18.18 |
| Starting at least 3 months prior to conception | 21,794     | 32.32 | 10,745     | 36.44 | 32,539     | 32.32 |
| Maternal age (years)                           |            |       |            |       |            |       |
| 20–24                                          | 31,318     | 46.44 | 13,210     | 44.80 | 44,528     | 46.44 |
| 25–29                                          | 26,516     | 39.32 | 11,473     | 38.91 | 37,989     | 39.32 |
| 30–34                                          | 6,666      | 9.88  | 3,259      | 11.05 | 9,925      | 9.88  |
| ≥35                                            | 2,721      | 4.03  | 1,432      | 4.86  | 4,153      | 4.03  |
| Missing                                        | 218        | 0.32  | 111        | 0.38  | 329        | 0.32  |
| Maternal ethnicity                             |            |       |            |       |            |       |
| Han                                            | 62,740     | 93.03 | 27,338     | 92.72 | 90,078     | 93.03 |
| Others                                         | 2,926      | 4.34  | 1,899      | 6.44  | 4,825      | 4.34  |
| Missing                                        | 1,773      | 2.63  | 248        | 0.84  | 2,021      | 2.63  |
| Maternal education                             |            |       |            |       |            |       |
| Primary school or below                        | 2,771      | 4.11  | 1,224      | 4.15  | 3,995      | 4.11  |
| Junior high school                             | 28,124     | 41.70 | 12,289     | 41.68 | 40,413     | 41.70 |
| Senior high school                             | 16,075     | 23.84 | 6,932      | 23.51 | 23,007     | 23.84 |
| College /University or above                   | 17,058     | 25.29 | 8,261      | 28.02 | 25,319     | 25.29 |
| Missing                                        | 3,411      | 5.06  | 779        | 2.64  | 4,190      | 5.06  |
| Maternal employment                            |            |       |            |       |            |       |
| Farmer                                         | 28,618     | 42.44 | 12,845     | 43.56 | 41,463     | 42.78 |
| Worker                                         | 6,646      | 9.85  | 2,752      | 9.33  | 9,398      | 9.70  |

|                                                    |        |       |        |       |        |       |
|----------------------------------------------------|--------|-------|--------|-------|--------|-------|
| waiter                                             | 7,253  | 10.75 | 2,948  | 10.00 | 10,201 | 10.52 |
| Merchant                                           | 2,332  | 3.46  | 1,063  | 3.61  | 3,395  | 3.50  |
| Housewife                                          | 3,767  | 5.59  | 1,458  | 4.94  | 5,225  | 5.39  |
| Teacher/civil servant/staff                        | 9,897  | 14.68 | 4,759  | 16.14 | 14,656 | 15.12 |
| Others                                             | 6,222  | 9.23  | 3,171  | 10.75 | 9,393  | 9.69  |
| Missing                                            | 2,704  | 4.01  | 489    | 1.66  | 3,193  | 3.29  |
| Maternal household registration                    |        |       |        |       |        |       |
| Rural                                              | 49,631 | 73.59 | 21,489 | 72.88 | 71,120 | 73.59 |
| Urban                                              | 17,802 | 26.40 | 7,995  | 27.12 | 25,797 | 26.40 |
| Missing                                            | 6      | 0.01  | 1      | 0.00  | 7      | 0.01  |
| Maternal BMI before pregnancy (kg/m <sup>2</sup> ) |        |       |        |       |        |       |
| <18.5                                              | 10,029 | 14.87 | 4,350  | 14.75 | 14,379 | 14.87 |
| 18.5–23.9                                          | 48,180 | 71.44 | 20,957 | 71.08 | 69,137 | 71.44 |
| 24–27.9                                            | 6,662  | 9.88  | 3,235  | 10.97 | 9,897  | 9.88  |
| ≥28                                                | 1,155  | 1.71  | 556    | 1.89  | 1,711  | 1.71  |
| Missing                                            | 1,413  | 2.10  | 387    | 1.31  | 1,800  | 2.10  |
| Passive smoking before pregnancy                   |        |       |        |       |        |       |
| No                                                 | 54,948 | 81.48 | 25,212 | 85.51 | 80,160 | 81.48 |
| Occasional                                         | 9,485  | 14.06 | 3,405  | 11.55 | 12,890 | 14.06 |
| Often                                              | 1,367  | 2.03  | 460    | 1.56  | 1,827  | 2.03  |
| Missing                                            | 1,639  | 2.43  | 408    | 1.38  | 2,047  | 2.43  |
| Husbands' smoking in early pregnancy               |        |       |        |       |        |       |
| No                                                 | 47,825 | 70.92 | 20,440 | 69.32 | 68,265 | 70.92 |
| Decreased                                          | 9,960  | 14.77 | 4,623  | 15.68 | 14,583 | 14.77 |
| Yes                                                | 9,571  | 14.19 | 4,356  | 14.77 | 13,927 | 14.19 |
| Missing                                            | 83     | 0.12  | 66     | 0.22  | 149    | 0.12  |
| parity                                             |        |       |        |       |        |       |
| 0                                                  | 48,248 | 71.54 | 20,068 | 68.06 | 68,316 | 71.54 |
| ≥1                                                 | 19,191 | 28.46 | 9,417  | 31.94 | 28,608 | 28.46 |





|                                                                            |                    |        |              |        |             |        |       |        |       |        |
|----------------------------------------------------------------------------|--------------------|--------|--------------|--------|-------------|--------|-------|--------|-------|--------|
|                                                                            | <18.5              | 3,240  | 15.29        | 1,838  | 15.54       | 2,669  | 15.35 | 2,078  | 13.64 | 9,825  |
|                                                                            | 18.5–23.9          | 15,323 | <b>72.33</b> | 8,453  | 71.47       | 12,373 | 71.14 | 10,776 | 70.71 | 46,925 |
|                                                                            | 24–27.9            | 1,943  | 9.17         | 1,089  | 9.21        | 1,746  | 10.04 | 1,620  | 10.63 | 6,398  |
|                                                                            | ≥28                | 328    | 1.55         | 190    | 1.61        | 256    | 1.47  | 317    | 2.08  | 1,091  |
|                                                                            | Missing            | 350    | 1.65         | 258    | 2.18        | 348    | 2.00  | 448    | 2.94  | 1,404  |
|                                                                            | Gravidity          |        |              |        |             |        |       |        |       |        |
|                                                                            | 0                  | 9,910  | 46.78        | 5,871  | 49.64       | 8,480  | 48.76 | 6,767  | 44.41 | 31,028 |
|                                                                            | ≥1                 | 10,909 | 51.50        | 5,694  | 48.14       | 8,556  | 49.20 | 8,015  | 52.60 | 33,174 |
|                                                                            | Missing            | 365    | 1.72         | 263    | 2.22        | 356    | 2.05  | 457    | 3.00  | 1,441  |
|                                                                            | Parity             |        |              |        |             |        |       |        |       |        |
|                                                                            | 0                  | 15,752 | 74.36        | 8,948  | 75.65       | 12,748 | 73.30 | 9,843  | 64.59 | 47,291 |
|                                                                            | ≥1                 | 5,432  | 25.64        | 2,880  | 24.35       | 4,644  | 26.70 | 5,396  | 35.41 | 18,352 |
| Maternal history of adverse pregnancy outcomes                             |                    |        |              |        |             |        |       |        |       |        |
|                                                                            | No                 | 12,558 | 59.28        | 7,348  | 62.12       | 10,748 | 61.80 | 9,527  | 62.52 | 40,181 |
|                                                                            | Yes                | 8,626  | <b>40.72</b> | 4,480  | 37.88       | 6,644  | 38.20 | 5,712  | 37.48 | 25,462 |
| Maternal history of chronic diseases                                       |                    |        |              |        |             |        |       |        |       |        |
|                                                                            | No                 | 21,008 | 99.17        | 11,755 | 99.38       | 17,302 | 99.48 | 15,174 | 99.57 | 65,239 |
|                                                                            | Yes                | 176    | <b>0.83</b>  | 73     | 0.62        | 90     | 0.52  | 65     | 0.43  | 404    |
| Maternal birth defects or history of a birth defect in a previous delivery |                    |        |              |        |             |        |       |        |       |        |
|                                                                            | No                 | 20,966 | 98.97        | 11,705 | 98.96       | 17,267 | 99.28 | 15,113 | 99.17 | 65,051 |
|                                                                            | Yes                | 218    | <b>1.03</b>  | 123    | <b>1.04</b> | 125    | 0.72  | 126    | 0.83  | 592    |
| Recruiting Year                                                            |                    |        |              |        |             |        |       |        |       |        |
|                                                                            | 2010               | 3,476  | <b>16.41</b> | 1,126  | 9.52        | 1,268  | 7.29  | 1,266  | 8.31  | 7,136  |
|                                                                            | 2011               | 2,349  | 11.09        | 1,554  | 13.14       | 1,500  | 8.62  | 1,208  | 7.93  | 6,611  |
|                                                                            | 2012               | 3,376  | 15.94        | 2,211  | 18.69       | 3,142  | 18.07 | 3,374  | 22.14 | 12,103 |
|                                                                            | 2013               | 4,012  | 18.94        | 2,094  | 17.70       | 3,902  | 22.44 | 4,537  | 29.77 | 14,545 |
|                                                                            | 2014               | 3,603  | 17.01        | 2,017  | 17.05       | 3,547  | 20.39 | 3,116  | 20.45 | 12,283 |
|                                                                            | 2015               | 4,368  | 20.62        | 2,826  | 23.89       | 4,033  | 23.19 | 1,738  | 11.40 | 12,965 |
| Areas in Chongqing                                                         |                    |        |              |        |             |        |       |        |       |        |
|                                                                            | Urban core area    | 6,758  | <b>31.90</b> | 2,930  | 24.77       | 4,158  | 23.91 | 3,124  | 20.50 | 16,970 |
|                                                                            | New urban district | 10,540 | <b>49.75</b> | 5,661  | 47.86       | 7,868  | 45.24 | 6,490  | 42.59 | 30,559 |
| Northeast ecological conservation area                                     |                    | 2,990  | 14.11        | 2,599  | 21.97       | 4,276  | 24.59 | 3,984  | 26.14 | 13,849 |
| Southeast ecological protection area                                       |                    | 896    | 4.23         | 638    | 5.39        | 1,090  | 6.27  | 1,641  | 10.77 | 4,265  |
| Compliance of FA supplementation                                           |                    |        |              |        |             |        |       |        |       |        |
|                                                                            | Irregular          | 831    | 3.92         | 841    | 7.11        | 1,795  | 10.32 |        |       |        |
|                                                                            | regular            | 20,353 | <b>96.08</b> | 10,987 | 92.89       | 15,597 | 89.68 |        |       |        |

**Table S3.** Risk ratios and 95% CIs for spontaneous abortion according to maternal periconceptional folic acid (FA) supplementation in sensitivity analysis.

|                                                | Sensitivity 1 <sup>a</sup> |           | Sensitivity 2 <sup>b</sup> |           | Sensitivity 3 <sup>c</sup> |           |
|------------------------------------------------|----------------------------|-----------|----------------------------|-----------|----------------------------|-----------|
|                                                | aRR                        | 95% CI    | aRR*                       | 95% CI    | aRR*                       | 95% CI    |
| No supplementation                             | 1.00                       |           | 1.00                       |           | 1.00                       |           |
| Having supplementation                         | 0.51                       | 0.48,0.55 | 0.51                       | 0.47,0.55 | 0.49                       | 0.46,0.52 |
| Starting at least 3 months prior to conception | 0.45                       | 0.41,0.50 | 0.45                       | 0.41,0.50 | 0.43                       | 0.40,0.47 |
| Starting 1-2 months prior to conception        | 0.55                       | 0.50,0.61 | 0.54                       | 0.48,0.60 | 0.52                       | 0.47,0.58 |
| Starting after conception                      | 0.55                       | 0.50,0.59 | 0.55                       | 0.50,0.60 | 0.52                       | 0.48,0.57 |

<sup>a</sup> This sensitivity analyses additionally were adjusted for maternal reproductive tract infection, cytomegalovirus, and toxoplasma infection before pregnancy. <sup>b</sup> This sensitivity analyses were excluded pregnancies of women without information of any covariates. <sup>c</sup> This sensitivity analyses were excluded pregnancies ended with induced abortion/still birth. **Abbreviations:** cRR, crude risk ratio; aRR, adjusted risk ratio; CI, confidence interval.

**Table S4.** The association between maternal periconceptional folic acid (FA) supplementation and the follow-ups time in gestation.

| Maternal periconceptional<br>FA supplementation | Follow-ups time in gestation |       |                |       | $\chi^2$ | $p$   |
|-------------------------------------------------|------------------------------|-------|----------------|-------|----------|-------|
|                                                 | $\leq 84$ days               |       | $\geq 85$ days |       |          |       |
|                                                 | N                            | %     | N              | %     |          |       |
| No supplementation                              | 8,107                        | 23.10 | 7,350          | 22.73 |          |       |
| Having supplementation                          | 26,982                       | 76.90 | 24,984         | 77.27 |          |       |
| Total                                           | 35,089                       |       | 32,334         |       | 1.3223   | 0.250 |

**Table S5.** Risk ratios and 95% CIs for spontaneous abortion (SA) according to maternal periconceptional folic acid (FA) supplementation in a subpopulation recruited in 2010 (N=7 136).

| Maternal periconceptional FA supplementation   | No. of Pregnancies | SAs, No. (%) | Model 1 |           | Model 2 <sup>a</sup> |                        |
|------------------------------------------------|--------------------|--------------|---------|-----------|----------------------|------------------------|
|                                                |                    |              | cRR     | 95% CI    | aRR                  | 95% CI                 |
| No supplementation                             | 1,266              | 52 (4.11)    | 1.00    | -         | 1.00                 | -                      |
| Having supplementation                         | 5,870              | 51 (0.87)    | 0.21    | 0.14,0.31 | 0.27                 | 0.18,0.41              |
| Starting at least 3 months prior to conception | 3,476              | 18 (0.52)    | 0.13    | 0.07,0.21 | 0.19                 | 0.11,0.34 <sup>b</sup> |
| Starting 1-2 months prior to conception        | 1,126              | 9 (0.80)     | 0.19    | 0.10,0.39 | 0.24                 | 0.12,0.47 <sup>b</sup> |
| Starting after conception                      | 1,268              | 24 (1.89)    | 0.46    | 0.29,0.74 | 0.41                 | 0.25,0.67 <sup>b</sup> |

<sup>a</sup> aRR adjusted for maternal BMI, passive smoking before pregnancy, history of adverse pregnancy outcomes, chronic diseases, birth defects or history of a birth defect in a previous delivery, and husbands' smoking in early pregnancy, in addition to maternal age, ethnicity, education, employment, household registration, and area of recruitment. <sup>b</sup> aRR for FA supplementation initiated at least 3months prior to conception was significantly lower than FA supplementation after conception ( $\chi^2=5.10$ ,  $p=0.0239$ ). **Abbreviations:** cRR, crude risk ratio; aRR, adjusted risk ratio; CI, confidence interval.

**Table S6.** Risk ratios and 95% CIs for pregnancies ending with still birth or induced abortion due to foetal abnormalities according to maternal periconceptional folic acid (FA).

| Maternal periconceptional FA supplementation   | No. of Pregnancies | Induced abortions or still births, No. (%) | Model 1 |           | Model 2 <sup>a</sup> |                        |
|------------------------------------------------|--------------------|--------------------------------------------|---------|-----------|----------------------|------------------------|
|                                                |                    |                                            | cRR     | 95% CI    | aRR                  | 95% CI                 |
| No supplementation                             | 13,878             | 1,028 (7.40)                               | 1.00    | -         | 1.00                 | -                      |
| Having supplementation                         | 48,241             | 1,049 (2.17)                               | 0.29    | 0.27,0.32 | 0.31                 | 0.29,0.34              |
| Starting at least 3 months prior to conception | 20,383             | 388 (1.90)                                 | 0.26    | 0.23,0.29 | 0.28                 | 0.25,0.32 <sup>b</sup> |
| Starting 1-2 months prior to conception        | 11,287             | 231 (2.05)                                 | 0.28    | 0.24,0.32 | 0.29                 | 0.25,0.34 <sup>b</sup> |
| Starting after conception                      | 16,571             | 430 (2.59)                                 | 0.35    | 0.31,0.39 | 0.35                 | 0.31,0.39 <sup>b</sup> |

<sup>a</sup> aRR adjusted for maternal BMI, passive smoking before pregnancy, history of adverse pregnancy outcomes, chronic diseases, birth defects or history of a birth defect in a previous delivery, and husbands' smoking in early pregnancy, in addition to maternal age, ethnicity, education, employment, household registration, year and area of recruitment. <sup>b</sup> aRR for FA supplementation initiated 3 months or more ( $\chi^2=8.60$ ,  $p=0.0034$ ), or initiated 1-2 months ( $\chi^2=4.62$ ,  $p=0.0315$ ) prior to conception was significantly lower than supplementation after conception. **Abbreviations:** cRR, crude risk ratio; aRR, adjusted risk ratio; CI, confidence interval
